# Supplementary material for: Resistance to Combined Anthracycline–Taxane Chemotherapy Is Associated with Altered Metabolism and Inflammation in Breast Carcinomas
Source: MDPI journal article supplement (doi:10.3390/ijms25021063), 2024-01-15
Supplement: s1 [file s1]

### Supplemental Table S3

#### The 224 genes differentiating responders and nonresponders in the PCR dataset and their performance in the RFS dataset

Only two genes, labeled with green font and highlighted, were significant in both datasets. For the rest of the genes in the RFS dataset, the association was either nonsignificant or the direction was reversed (Fold Change < 1); thus, gene expression was higher in responders.

| GENE SYMBOL | PCR       |        |             |          |         |           | RFS         |         |           |
|-------------|-----------|--------|-------------|----------|---------|-----------|-------------|---------|-----------|
|             | N_nonresp | N_resp | Fold Change | MannW_p  | ROC AUC | ROC_AUC_p | Fold Change | ROC AUC | ROC_AUC_p |
| PRR5        | 435       | 199    | 1.45        | 2.78E-19 | 0.722   | 0         | 1.09        | 0.574   | 0.043     |
| PARP16      | 435       | 199    | 1.45        | 7.89E-19 | 0.719   | 0         | 1.13        | 0.587   | 0.021     |
| UBA1        | 435       | 199    | 1.45        | 7.65E-17 | 0.706   | 0         | 0.93        | 0.594   | 0.013     |
| PNPLA6      | 435       | 199    | 1.45        | 7.2E-16  | 0.699   | 0         | 1.07        | 0.54    | 0.18      |
| TESK2       | 435       | 199    | 1.45        | 1.89E-15 | 0.697   | 0         | 1.02        | 0.509   | 0.42      |
| ALOX15B     | 435       | 199    | 1.45        | 3.49E-14 | 0.687   | 1.1E-16   | 0.42        | 0.519   | 0.34      |
| ACTN4       | 435       | 199    | 1.45        | 1.1E-12  | 0.676   | 3.1E-13   | 1.05        | 0.537   | 0.19      |
| EMP3        | 435       | 199    | 1.45        | 5.93E-10 | 0.653   | 2.1E-11   | 1.32        | 0.6     | 0.0087    |
| BAP1        | 435       | 199    | 1.46        | 5.5E-19  | 0.72    | 0         | 0.98        | 0.524   | 0.3       |
| MCRS1       | 435       | 199    | 1.46        | 7.05E-19 | 0.719   | 0         | 0.86        | 0.656   | 0.000094  |
| GNAI2       | 435       | 199    | 1.46        | 7.18E-18 | 0.713   | 0         | 0.93        | 0.551   | 0.12      |
| COX10       | 435       | 199    | 1.46        | 9.45E-18 | 0.712   | 0         | 1.08        | 0.566   | 0.066     |
| SAPS1       | 435       | 199    | 1.46        | 3.23E-17 | 0.709   | 0         | 0.96        | 0.517   | 0.35      |
| REEP4       | 435       | 199    | 1.46        | 1.07E-16 | 0.705   | 0         | 1.05        | 0.551   | 0.13      |
| MIIP        | 435       | 199    | 1.46        | 3.35E-16 | 0.702   | 0         | 1.21        | 0.661   | 0.000037  |
| PPP2R5D     | 435       | 199    | 1.46        | 4.48E-16 | 0.701   | 0         | 1.12        | 0.586   | 0.025     |
| SREBF2      | 435       | 199    | 1.46        | 7.03E-15 | 0.692   | 1.1E-16   | 1.06        | 0.514   | 0.37      |
| RAP1GAP     | 435       | 199    | 1.46        | 9.72E-13 | 0.676   | 1.5E-14   | 0.92        | 0.503   | 0.47      |
| RHOT2       | 435       | 199    | 1.46        | 1.76E-11 | 0.666   | 4.6E-15   | 0.77        | 0.637   | 0.00068   |
| PTGES       | 435       | 199    | 1.46        | 7.96E-08 | 0.633   | 9.6E-09   | 0.85        | 0.509   | 0.43      |
| MGRN1       | 435       | 199    | 1.47        | 1.46E-20 | 0.73    | 0         | 0.92        | 0.586   | 0.027     |
| IMPDH1      | 435       | 199    | 1.47        | 1.06E-18 | 0.718   | 0         | 1.11        | 0.574   | 0.047     |
| AVPI1       | 435       | 199    | 1.47        | 6.12E-18 | 0.713   | 0         | 1.21        | 0.634   | 0.0005    |
| PXN         | 435       | 199    | 1.47        | 9.76E-18 | 0.712   | 0         | 1.09        | 0.575   | 0.047     |
| RMND5B      | 435       | 199    | 1.47        | 1.58E-17 | 0.711   | 0         | 0.91        | 0.607   | 0.0087    |
| CEP250      | 435       | 199    | 1.47        | 2.29E-16 | 0.703   | 0         | 1.07        | 0.546   | 0.15      |

|          |     |     |      |             |       |            |      |       |            |
|----------|-----|-----|------|-------------|-------|------------|------|-------|------------|
| EML2     | 435 | 199 | 1.47 | 2.8E-15     | 0.695 | 0          | 0.86 | 0.587 | 0.027      |
| ITGA5    | 435 | 199 | 1.47 | 1.02E-12    | 0.676 | 6.9E-15    | 1.20 | 0.6   | 0.01       |
| S100A14  | 435 | 199 | 1.47 | 2.23E-08    | 0.638 | 2.4E-09    | 0.94 | 0.546 | 0.15       |
| DOLPP1   | 435 | 199 | 1.48 | 2.03E-20    | 0.729 | 0          | 1.16 | 0.641 | 0.00064    |
| IPO13    | 435 | 199 | 1.48 | 6.74E-17    | 0.706 | 0          | 1.12 | 0.601 | 0.0087     |
| C12orf49 | 435 | 199 | 1.48 | 9.29E-17    | 0.706 | 0          | 1.32 | 0.699 | 0.00000017 |
| FMO4     | 435 | 199 | 1.48 | 5.04E-16    | 0.701 | 0          | 1.31 | 0.672 | 0.000014   |
| B4GALT2  | 435 | 199 | 1.48 | 1.18E-15    | 0.698 | 0          | 1.09 | 0.531 | 0.24       |
| CIDEB    | 435 | 199 | 1.48 | 1.71E-14    | 0.69  | 4.4E-16    | 1.21 | 0.639 | 0.00054    |
| MCCC2    | 435 | 199 | 1.48 | 4.87E-13    | 0.679 | 2.3E-15    | 0.66 | 0.642 | 0.00084    |
| ILK      | 435 | 199 | 1.49 | 1.59E-23    | 0.747 | 0          | 0.94 | 0.554 | 0.12       |
| MAZ      | 435 | 199 | 1.49 | 7.6E-20     | 0.725 | 0          | 0.94 | 0.567 | 0.063      |
| SHROOM2  | 435 | 199 | 1.49 | 1.5E-18     | 0.717 | 0          | 0.97 | 0.513 | 0.39       |
| SLC22A5  | 435 | 199 | 1.49 | 1.91E-17    | 0.71  | 0          | 0.95 | 0.517 | 0.36       |
| SLC7A8   | 435 | 199 | 1.49 | 8.36E-14    | 0.685 | 0          | 0.73 | 0.612 | 0.0067     |
| GLB1L2   | 435 | 199 | 1.49 | 2.38E-12    | 0.673 | 4.8E-13    | 1.02 | 0.504 | 0.47       |
| SCCPDH   | 435 | 199 | 1.49 | 3.77E-12    | 0.672 | 1.9E-14    | 0.78 | 0.591 | 0.02       |
| DHRS9    | 435 | 199 | 1.49 | 3.22E-10    | 0.655 | 2.9E-11    | 1.43 | 0.646 | 0.00013    |
| RHOH     | 435 | 199 | 1.49 | 0.000000278 | 0.627 | 2.4E-08    | 0.72 | 0.62  | 0.0029     |
| ZNF629   | 435 | 199 | 1.5  | 1.29E-22    | 0.742 | 0          | 0.95 | 0.551 | 0.13       |
| SPR      | 435 | 199 | 1.5  | 4.85E-18    | 0.714 | 0          | 0.87 | 0.556 | 0.11       |
| OGFR     | 435 | 199 | 1.5  | 2.4E-16     | 0.703 | 0          | 1.10 | 0.599 | 0.014      |
| C11orf51 | 435 | 199 | 1.5  | 8.03E-16    | 0.699 | 0          | 0.96 | 0.551 | 0.13       |
| TOP1     | 435 | 199 | 1.5  | 1.67E-14    | 0.69  | 2.2E-16    | 0.98 | 0.503 | 0.48       |
| GPC1     | 435 | 199 | 1.5  | 1.06E-12    | 0.676 | 7.8E-16    | 0.78 | 0.602 | 0.012      |
| SELP     | 435 | 199 | 1.5  | 2.79E-12    | 0.673 | 2.1E-14    | 1.24 | 0.661 | 0.000055   |
| TBC1D10B | 435 | 199 | 1.51 | 2.39E-20    | 0.729 | 0          | 1.10 | 0.589 | 0.021      |
| BSG      | 435 | 199 | 1.51 | 2.09E-17    | 0.71  | 0          | 0.83 | 0.628 | 0.0012     |
| ARHGEF16 | 435 | 199 | 1.51 | 2.38E-17    | 0.71  | 0          | 0.93 | 0.539 | 0.2        |
| NELL2    | 435 | 199 | 1.51 | 0.000000526 | 0.624 | 0.00000012 | 0.72 | 0.537 | 0.21       |
| MAGED2   | 435 | 199 | 1.51 | 0.00000347  | 0.615 | 0.00000038 | 0.57 | 0.688 | 0.0000016  |
| PCGF2    | 435 | 199 | 1.52 | 1.05E-20    | 0.731 | 0          | 0.98 | 0.523 | 0.3        |
| TPCN1    | 435 | 199 | 1.52 | 1.06E-20    | 0.731 | 0          | 0.92 | 0.539 | 0.2        |
| ABHD4    | 435 | 199 | 1.52 | 1.54E-20    | 0.73  | 0          | 1.02 | 0.511 | 0.41       |
| ZNF467   | 435 | 199 | 1.52 | 7.26E-19    | 0.719 | 0          | 1.03 | 0.51  | 0.42       |

|           |     |     |      |             |       |            |      |       |         |
|-----------|-----|-----|------|-------------|-------|------------|------|-------|---------|
| SORBS3    | 435 | 199 | 1.52 | 1.88E-18    | 0.717 | 0          | 0.97 | 0.503 | 0.48    |
| MID1IP1   | 435 | 199 | 1.52 | 3.47E-18    | 0.715 | 0          | 1.24 | 0.625 | 0.0014  |
| SPATA20   | 435 | 199 | 1.52 | 3.23E-16    | 0.702 | 0          | 0.76 | 0.621 | 0.004   |
| CEACAM6   | 435 | 199 | 1.52 | 7.21E-08    | 0.633 | 2.5E-08    | 0.92 | 0.557 | 0.099   |
| MLEC      | 435 | 199 | 1.53 | 3.72E-20    | 0.727 | 0          | 0.91 | 0.594 | 0.017   |
| EML3      | 435 | 199 | 1.53 | 1.43E-17    | 0.711 | 0          | 1.03 | 0.53  | 0.25    |
| CA12      | 435 | 199 | 1.53 | 0.000000565 | 0.624 | 0.00000016 | 0.56 | 0.642 | 0.00075 |
| CRABP2    | 435 | 199 | 1.53 | 0.000000867 | 0.622 | 0.00000013 | 0.81 | 0.546 | 0.15    |
| CHST10    | 435 | 199 | 1.54 | 4.9E-21     | 0.733 | 0          | 1.07 | 0.538 | 0.19    |
| GDI1      | 435 | 199 | 1.54 | 6.76E-21    | 0.732 | 0          | 0.91 | 0.52  | 0.33    |
| ERAL1     | 435 | 199 | 1.54 | 7.41E-21    | 0.732 | 0          | 0.96 | 0.525 | 0.29    |
| WFS1      | 435 | 199 | 1.54 | 3.17E-19    | 0.722 | 0          | 0.81 | 0.622 | 0.0033  |
| GAS8      | 435 | 199 | 1.54 | 1.01E-15    | 0.698 | 0          | 1.06 | 0.504 | 0.46    |
| NKX3-1    | 435 | 199 | 1.54 | 5.45E-13    | 0.678 | 6.8E-15    | 0.65 | 0.583 | 0.035   |
| KIAA0556  | 435 | 199 | 1.55 | 1.67E-24    | 0.753 | 0          | 0.92 | 0.563 | 0.084   |
| NECAB3    | 435 | 199 | 1.55 | 4E-20       | 0.727 | 0          | 0.87 | 0.564 | 0.076   |
| PHLDA3    | 435 | 199 | 1.55 | 9.9E-20     | 0.725 | 0          | 0.99 | 0.526 | 0.29    |
| TSPYL2    | 435 | 199 | 1.55 | 7.62E-17    | 0.706 | 0          | 0.93 | 0.528 | 0.26    |
| PCBD1     | 435 | 199 | 1.55 | 1.62E-16    | 0.704 | 0          | 0.88 | 0.587 | 0.024   |
| BLOC1S1   | 435 | 199 | 1.56 | 7.79E-23    | 0.743 | 0          | 0.86 | 0.617 | 0.0041  |
| ITPKC     | 435 | 199 | 1.56 | 3.39E-22    | 0.74  | 0          | 1.09 | 0.555 | 0.1     |
| FAM102A   | 435 | 199 | 1.56 | 4.67E-20    | 0.727 | 0          | 0.89 | 0.586 | 0.027   |
| CHPF      | 435 | 199 | 1.56 | 5.42E-19    | 0.72  | 0          | 1.08 | 0.548 | 0.15    |
| LOC171220 | 435 | 199 | 1.56 | 1.61E-18    | 0.717 | 0          | 1.11 | 0.581 | 0.032   |
| GSK3A     | 435 | 199 | 1.56 | 7.9E-18     | 0.713 | 0          | 1.07 | 0.553 | 0.11    |
| BANF1     | 435 | 199 | 1.56 | 8.49E-17    | 0.706 | 0          | 0.80 | 0.645 | 0.00022 |
| KIAA0586  | 435 | 199 | 1.57 | 3.74E-23    | 0.745 | 0          | 1.04 | 0.533 | 0.23    |
| PTPN9     | 435 | 199 | 1.57 | 2.71E-20    | 0.728 | 0          | 1.05 | 0.545 | 0.15    |
| DGKA      | 435 | 199 | 1.57 | 2.8E-20     | 0.728 | 0          | 1.16 | 0.606 | 0.0061  |
| ARHGDIA   | 435 | 199 | 1.57 | 2.69E-17    | 0.709 | 0          | 0.89 | 0.572 | 0.056   |
| SEMA4A    | 435 | 199 | 1.57 | 1.12E-16    | 0.705 | 0          | 1.03 | 0.532 | 0.24    |
| TRIP10    | 435 | 199 | 1.57 | 3.72E-16    | 0.701 | 0          | 1.11 | 0.569 | 0.063   |
| RAB6B     | 435 | 199 | 1.57 | 1.35E-15    | 0.698 | 0          | 1.26 | 0.647 | 0.00021 |
| THTPA     | 435 | 199 | 1.57 | 2.9E-15     | 0.695 | 0          | 0.92 | 0.552 | 0.12    |
| SLC22A18  | 435 | 199 | 1.57 | 3.23E-15    | 0.695 | 0          | 0.79 | 0.613 | 0.0063  |

|          |     |     |      |            |       |            |      |       |            |
|----------|-----|-----|------|------------|-------|------------|------|-------|------------|
| G6PD     | 435 | 199 | 1.57 | 3.09E-11   | 0.664 | 1.5E-12    | 0.99 | 0.572 | 0.052      |
| CREB3L1  | 435 | 199 | 1.57 | 2.61E-10   | 0.656 | 2.9E-12    | 0.88 | 0.548 | 0.14       |
| PPP2R1A  | 435 | 199 | 1.58 | 2.08E-18   | 0.716 | 0          | 0.82 | 0.697 | 0.00000036 |
| MVK      | 435 | 199 | 1.58 | 2.68E-18   | 0.716 | 0          | 1.11 | 0.587 | 0.022      |
| AATK     | 435 | 199 | 1.58 | 3.99E-17   | 0.708 | 0          | 1.03 | 0.539 | 0.2        |
| IL2RG    | 435 | 199 | 1.58 | 1.4E-12    | 0.675 | 3.3E-13    | 1.26 | 0.645 | 0.00027    |
| PON3     | 435 | 199 | 1.58 | 4.77E-08   | 0.635 | 6.1E-09    | 0.81 | 0.511 | 0.4        |
| TTC39A   | 435 | 199 | 1.58 | 0.00000312 | 0.615 | 0.00000041 | 0.60 | 0.625 | 0.0028     |
| FXYD3    | 435 | 199 | 1.59 | 7.49E-21   | 0.732 | 0          | 1.02 | 0.511 | 0.41       |
| FLOT2    | 435 | 199 | 1.59 | 1.88E-20   | 0.729 | 0          | 1.03 | 0.537 | 0.2        |
| FPGS     | 435 | 199 | 1.59 | 1.91E-20   | 0.729 | 0          | 1.10 | 0.561 | 0.081      |
| AGRN     | 435 | 199 | 1.59 | 5.09E-19   | 0.72  | 0          | 1.03 | 0.528 | 0.27       |
| GPSM3    | 435 | 199 | 1.59 | 2.21E-12   | 0.674 | 1.4E-14    | 1.23 | 0.605 | 0.0067     |
| ATP6V0A1 | 435 | 199 | 1.6  | 9.53E-25   | 0.754 | 0          | 1.01 | 0.501 | 0.49       |
| MOSPD3   | 435 | 199 | 1.6  | 7.02E-20   | 0.726 | 0          | 1.00 | 0.529 | 0.25       |
| MAP1A    | 435 | 199 | 1.6  | 1.79E-17   | 0.71  | 0          | 1.23 | 0.633 | 0.00092    |
| RASSF7   | 435 | 199 | 1.6  | 8.93E-12   | 0.669 | 4.7E-15    | 0.72 | 0.685 | 0.0000038  |
| CRIP2    | 435 | 199 | 1.6  | 2.21E-11   | 0.665 | 1E-13      | 0.66 | 0.701 | 0.00000024 |
| ORAI3    | 435 | 199 | 1.61 | 7.87E-28   | 0.77  | 0          | 0.95 | 0.527 | 0.28       |
| PPP2R4   | 435 | 199 | 1.61 | 1.47E-21   | 0.736 | 0          | 0.86 | 0.652 | 0.00012    |
| ARFIP2   | 435 | 199 | 1.61 | 8.14E-19   | 0.719 | 0          | 0.71 | 0.69  | 0.000005   |
| TRMT2B   | 435 | 199 | 1.61 | 2.75E-18   | 0.716 | 0          | 1.29 | 0.685 | 0.0000012  |
| NOVA1    | 435 | 199 | 1.61 | 4.56E-08   | 0.635 | 6.2E-09    | 0.72 | 0.547 | 0.16       |
| CST3     | 435 | 199 | 1.61 | 0.00000254 | 0.616 | 0.00000016 | 0.68 | 0.668 | 0.000021   |
| APBB3    | 435 | 199 | 1.62 | 1.11E-21   | 0.737 | 0          | 1.10 | 0.566 | 0.064      |
| DALRD3   | 435 | 199 | 1.62 | 4.01E-21   | 0.733 | 0          | 0.81 | 0.606 | 0.01       |
| IDUA     | 435 | 199 | 1.62 | 3.68E-19   | 0.721 | 0          | 0.78 | 0.622 | 0.0035     |
| PRKCSH   | 435 | 199 | 1.62 | 1.64E-14   | 0.69  | 4.1E-15    | 0.87 | 0.615 | 0.0029     |
| SLC9A3R1 | 435 | 199 | 1.62 | 9.98E-11   | 0.66  | 1.9E-12    | 0.69 | 0.669 | 0.000023   |
| NUCB1    | 435 | 199 | 1.63 | 9.24E-20   | 0.725 | 0          | 0.85 | 0.597 | 0.013      |
| CLPTM1   | 435 | 199 | 1.63 | 1.47E-16   | 0.704 | 0          | 0.77 | 0.663 | 0.000044   |
| C9orf7   | 435 | 199 | 1.64 | 4.68E-20   | 0.727 | 0          | 0.87 | 0.599 | 0.014      |
| ROGDI    | 435 | 199 | 1.64 | 6.3E-20    | 0.726 | 0          | 0.78 | 0.652 | 0.00035    |
| FUT6     | 435 | 199 | 1.64 | 1.68E-14   | 0.69  | 2.2E-16    | 1.26 | 0.599 | 0.011      |
| KRT18    | 435 | 199 | 1.64 | 6.55E-13   | 0.678 | 1.6E-15    | 0.79 | 0.635 | 0.00083    |

|          |     |     |      |             |       |           |      |       |            |
|----------|-----|-----|------|-------------|-------|-----------|------|-------|------------|
| ESR1     | 435 | 199 | 1.64 | 1.11E-10    | 0.66  | 1.8E-11   | 0.44 | 0.611 | 0.0099     |
| ADCY1    | 435 | 199 | 1.64 | 2.11E-09    | 0.648 | 3.5E-10   | 0.62 | 0.567 | 0.075      |
| ADAP1    | 435 | 199 | 1.65 | 1.36E-21    | 0.736 | 0         | 1.08 | 0.563 | 0.082      |
| CNNM3    | 435 | 199 | 1.65 | 2.57E-21    | 0.734 | 0         | 0.88 | 0.63  | 0.0016     |
| ABCA3    | 435 | 199 | 1.65 | 8.29E-12    | 0.669 | 2.3E-14   | 0.66 | 0.679 | 0.00001    |
| HOXC10   | 435 | 199 | 1.65 | 1.29E-09    | 0.65  | 2.5E-11   | 0.84 | 0.516 | 0.38       |
| LYPD3    | 435 | 199 | 1.66 | 1.19E-13    | 0.683 | 4.4E-16   | 0.83 | 0.575 | 0.044      |
| KIF5C    | 435 | 199 | 1.66 | 6.66E-13    | 0.678 | 7.5E-15   | 0.70 | 0.569 | 0.066      |
| FAM174B  | 435 | 199 | 1.66 | 2.43E-12    | 0.673 | 1.6E-15   | 0.50 | 0.647 | 0.00028    |
| ABCA2    | 435 | 199 | 1.67 | 7.29E-20    | 0.726 | 0         | 1.15 | 0.589 | 0.022      |
| PKM2     | 435 | 199 | 1.67 | 2.28E-16    | 0.703 | 0         | 1.01 | 0.535 | 0.21       |
| CALCOCO1 | 435 | 199 | 1.68 | 2.34E-20    | 0.729 | 0         | 1.10 | 0.547 | 0.14       |
| CYP3A4   | 435 | 199 | 1.68 | 1.64E-16    | 0.704 | 0         | 1.25 | 0.616 | 0.0027     |
| KIAA1467 | 435 | 199 | 1.69 | 4.94E-17    | 0.707 | 0         | 0.85 | 0.559 | 0.094      |
| SPDEF    | 435 | 199 | 1.69 | 8.84E-15    | 0.692 | 0         | 0.62 | 0.672 | 0.000051   |
| ZNF580   | 435 | 199 | 1.69 | 1.93E-08    | 0.639 | 2E-10     | 0.59 | 0.7   | 0.00000016 |
| GRINA    | 435 | 199 | 1.7  | 2.19E-22    | 0.741 | 0         | 1.00 | 0.547 | 0.14       |
| SCAMP5   | 435 | 199 | 1.7  | 1.6E-20     | 0.73  | 0         | 1.14 | 0.6   | 0.009      |
| DMWD     | 435 | 199 | 1.7  | 1.07E-17    | 0.712 | 0         | 1.09 | 0.535 | 0.21       |
| C8orf30A | 435 | 199 | 1.71 | 9.02E-23    | 0.743 | 0         | 1.24 | 0.642 | 0.00037    |
| P4HTM    | 435 | 199 | 1.71 | 3.82E-22    | 0.739 | 0         | 0.79 | 0.587 | 0.032      |
| SALL2    | 435 | 199 | 1.71 | 4.95E-22    | 0.739 | 0         | 0.97 | 0.531 | 0.24       |
| CCDC9    | 435 | 199 | 1.71 | 1.2E-19     | 0.724 | 0         | 1.14 | 0.567 | 0.057      |
| SLC2A9   | 435 | 199 | 1.71 | 4.73E-19    | 0.721 | 0         | 1.13 | 0.6   | 0.011      |
| RNF122   | 435 | 199 | 1.71 | 2.09E-17    | 0.71  | 0         | 1.14 | 0.601 | 0.01       |
| NAT1     | 435 | 199 | 1.71 | 0.00000686  | 0.611 | 0.0000017 | 0.41 | 0.652 | 0.00023    |
| RAB31L1  | 435 | 199 | 1.72 | 1.2E-18     | 0.718 | 0         | 1.11 | 0.598 | 0.013      |
| SAP25    | 435 | 199 | 1.72 | 1.3E-18     | 0.718 | 0         | 1.18 | 0.605 | 0.0073     |
| IKBKG    | 435 | 199 | 1.72 | 2.97E-18    | 0.715 | 0         | 1.17 | 0.63  | 0.001      |
| PCGF1    | 435 | 199 | 1.73 | 7.5E-21     | 0.732 | 0         | 0.92 | 0.57  | 0.055      |
| ZYX      | 435 | 199 | 1.73 | 1.22E-20    | 0.73  | 0         | 1.11 | 0.583 | 0.032      |
| HSPB1    | 435 | 199 | 1.73 | 0.000000203 | 0.628 | 1.4E-08   | 0.73 | 0.59  | 0.022      |
| NAPA     | 435 | 199 | 1.74 | 3.27E-21    | 0.734 | 0         | 0.74 | 0.706 | 0.00000014 |
| RHOB     | 435 | 199 | 1.74 | 6.31E-12    | 0.67  | 7.3E-15   | 0.58 | 0.671 | 0.000047   |
| FAM63A   | 435 | 199 | 1.75 | 4.67E-23    | 0.744 | 0         | 0.76 | 0.63  | 0.0021     |

|          |     |     |      |            |       |            |      |       |          |
|----------|-----|-----|------|------------|-------|------------|------|-------|----------|
| SKAP1    | 435 | 199 | 1.75 | 9.76E-23   | 0.743 | 0          | 1.06 | 0.537 | 0.2      |
| RAB26    | 435 | 199 | 1.76 | 5.2E-24    | 0.75  | 0          | 0.93 | 0.548 | 0.14     |
| SYT1     | 435 | 199 | 1.76 | 3.16E-17   | 0.709 | 0          | 0.97 | 0.51  | 0.41     |
| CYP1A2   | 435 | 199 | 1.76 | 1.37E-16   | 0.704 | 0          | 1.30 | 0.597 | 0.0098   |
| FBP1     | 435 | 199 | 1.76 | 2.03E-12   | 0.674 | 2.3E-15    | 0.62 | 0.672 | 0.000048 |
| MLPH     | 435 | 199 | 1.76 | 2.39E-11   | 0.665 | 1.8E-13    | 0.48 | 0.68  | 0.000042 |
| CEACAM5  | 435 | 199 | 1.77 | 1.45E-15   | 0.697 | 0          | 0.86 | 0.519 | 0.34     |
| RAB17    | 435 | 199 | 1.78 | 2.06E-21   | 0.735 | 0          | 0.90 | 0.561 | 0.086    |
| IGFBP4   | 435 | 199 | 1.78 | 7.28E-09   | 0.643 | 9.7E-11    | 0.61 | 0.64  | 0.00031  |
| TNK1     | 435 | 199 | 1.8  | 5.87E-24   | 0.75  | 0          | 1.09 | 0.58  | 0.036    |
| GIT1     | 435 | 199 | 1.8  | 3.46E-18   | 0.715 | 0          | 1.11 | 0.53  | 0.25     |
| ATP10B   | 435 | 199 | 1.8  | 8.06E-17   | 0.706 | 0          | 1.22 | 0.621 | 0.0023   |
| NR1D1    | 435 | 199 | 1.81 | 3.3E-19    | 0.721 | 0          | 1.24 | 0.601 | 0.0081   |
| REEP1    | 435 | 199 | 1.81 | 9.62E-18   | 0.712 | 0          | 0.76 | 0.534 | 0.24     |
| FPR1     | 435 | 199 | 1.81 | 0.00000308 | 0.615 | 0.00000041 | 1.61 | 0.568 | 0.063    |
| KDM6B    | 435 | 199 | 1.82 | 2.63E-20   | 0.728 | 0          | 0.99 | 0.501 | 0.49     |
| C19orf22 | 435 | 199 | 1.83 | 7.98E-22   | 0.737 | 0          | 1.14 | 0.55  | 0.12     |
| EPB49    | 435 | 199 | 1.84 | 9.45E-19   | 0.719 | 0          | 1.15 | 0.55  | 0.12     |
| TAT      | 435 | 199 | 1.84 | 4.24E-12   | 0.671 | 1.3E-13    | 0.44 | 0.573 | 0.063    |
| SLC44A4  | 435 | 199 | 1.85 | 4.68E-11   | 0.663 | 3.7E-13    | 0.49 | 0.667 | 0.000066 |
| FASN     | 435 | 199 | 1.86 | 4.13E-11   | 0.663 | 4.6E-13    | 0.55 | 0.649 | 0.0003   |
| CNTD2    | 435 | 199 | 1.87 | 9.85E-21   | 0.731 | 0          | 1.03 | 0.517 | 0.35     |
| TAC3     | 435 | 199 | 1.87 | 1.14E-19   | 0.724 | 0          | 1.10 | 0.576 | 0.046    |
| ECM1     | 435 | 199 | 1.87 | 3.09E-14   | 0.688 | 1.1E-16    | 0.99 | 0.524 | 0.31     |
| PF4      | 435 | 199 | 1.88 | 2.36E-12   | 0.673 | 1.2E-13    | 1.59 | 0.521 | 0.31     |
| EPHX1    | 435 | 199 | 1.89 | 1.22E-17   | 0.711 | 0          | 0.78 | 0.615 | 0.0038   |
| RAMP3    | 435 | 199 | 1.89 | 2.32E-13   | 0.681 | 2.2E-16    | 0.96 | 0.538 | 0.21     |
| HBB      | 435 | 199 | 1.9  | 5.21E-09   | 0.644 | 9.3E-11    | 0.85 | 0.501 | 0.49     |
| STXBP2   | 435 | 199 | 1.92 | 1.2E-21    | 0.736 | 0          | 0.72 | 0.666 | 0.000061 |
| GRIK5    | 435 | 199 | 1.92 | 6.7E-21    | 0.732 | 0          | 1.06 | 0.557 | 0.11     |
| CDC5L    | 435 | 199 | 1.93 | 2.17E-15   | 0.696 | 0          | 1.25 | 0.585 | 0.024    |
| MYL4     | 435 | 199 | 1.94 | 2.52E-19   | 0.722 | 0          | 1.39 | 0.612 | 0.0048   |
| ZNF552   | 435 | 199 | 1.95 | 2.34E-20   | 0.729 | 0          | 0.86 | 0.555 | 0.11     |
| FOXA1    | 435 | 199 | 1.98 | 1.46E-15   | 0.697 | 0          | 0.52 | 0.685 | 0.00003  |
| C19orf21 | 435 | 199 | 2.02 | 9.43E-19   | 0.719 | 0          | 0.85 | 0.555 | 0.12     |

|                |            |            |             |                 |              |            |             |              |                |
|----------------|------------|------------|-------------|-----------------|--------------|------------|-------------|--------------|----------------|
| CYP2B7P1       | 435        | 199        | 2.02        | 1.14E-11        | 0.668        | 9.6E-14    | 0.31        | 0.635        | 0.0011         |
| TCTN2          | 435        | 199        | 2.03        | 3.05E-20        | 0.728        | 0          | 1.27        | 0.594        | 0.014          |
| <b>OPHN1</b>   | <b>435</b> | <b>199</b> | <b>2.08</b> | <b>6.15E-18</b> | <b>0.713</b> | <b>0</b>   | <b>1.49</b> | <b>0.635</b> | <b>0.00063</b> |
| CNR2           | 435        | 199        | 2.1         | 7.57E-22        | 0.737        | 0          | 1.26        | 0.61         | 0.0046         |
| TFF1           | 435        | 199        | 2.11        | 6.53E-08        | 0.634        | 1.1E-08    | 0.40        | 0.646        | 0.00037        |
| FCGR3B         | 435        | 199        | 2.18        | 8.35E-09        | 0.642        | 9.7E-10    | 1.96        | 0.547        | 0.14           |
| TSPAN1         | 435        | 199        | 2.19        | 1.09E-12        | 0.676        | 1.2E-14    | 0.48        | 0.605        | 0.011          |
| HBD            | 435        | 199        | 2.19        | 1.1E-10         | 0.66         | 5.4E-12    | 1.85        | 0.533        | 0.22           |
| SERPINA6       | 435        | 199        | 2.21        | 7.81E-14        | 0.685        | 6.7E-16    | 1.37        | 0.558        | 0.097          |
| SCUBE2         | 435        | 199        | 2.21        | 6.05E-09        | 0.644        | 1.1E-10    | 0.31        | 0.65         | 0.00033        |
| <b>S100A12</b> | <b>435</b> | <b>199</b> | <b>2.29</b> | <b>9.27E-16</b> | <b>0.699</b> | <b>0</b>   | <b>1.79</b> | <b>0.58</b>  | <b>0.033</b>   |
| TFF3           | 435        | 199        | 2.3         | 8.39E-09        | 0.642        | 7.1E-10    | 0.34        | 0.639        | 0.00097        |
| MEFV           | 435        | 199        | 2.31        | 4.64E-17        | 0.708        | 0          | 1.31        | 0.604        | 0.0074         |
| BCAM           | 435        | 199        | 2.33        | 4.29E-25        | 0.756        | 0          | 0.68        | 0.645        | 0.00055        |
| SERPINA5       | 435        | 199        | 2.39        | 0.000000871     | 0.622        | 0.00000007 | 0.62        | 0.607        | 0.011          |
| BEX1           | 435        | 199        | 2.48        | 2.39E-10        | 0.657        | 1.9E-11    | 0.39        | 0.505        | 0.46           |
| CYP2A6         | 435        | 199        | 2.76        | 6.73E-16        | 0.7          | 0          | 1.27        | 0.554        | 0.12           |
| EEF1A2         | 435        | 199        | 3.24        | 1.67E-17        | 0.711        | 0          | 0.54        | 0.542        | 0.19           |
| CGA            | 435        | 199        | 3.87        | 1.71E-17        | 0.71         | 0          | 0.92        | 0.503        | 0.48           |
| CPB1           | 435        | 199        | 4.8         | 4.19E-12        | 0.671        | 7.4E-14    | 0.24        | 0.606        | 0.014          |
| SMR3B          | 435        | 199        | 5.16        | 5.71E-11        | 0.662        | 6.1E-11    | 19.55       | 0.567        | 0.069          |
| CARTPT         | 435        | 199        | 8.12        | 8.83E-16        | 0.699        | 0          | 2.20        | 0.504        | 0.46           |
| NTS            | 435        | 199        | 14.7        | 1.24E-08        | 0.641        | 3.1E-10    | 6.72        | 0.571        | 0.057          |
