# Supplementary material for: Resistance to Combined Anthracycline–Taxane Chemotherapy Is Associated with Altered Metabolism and Inflammation in Breast Carcinomas
Source: MDPI journal article supplement (doi:10.3390/ijms25021063), 2024-01-15
Supplement: s1 [file s1]

## Supplemental Table S2

### The 51 genes differentiating responders and nonresponders in the RFS dataset and their performance in the PCR dataset

Only six genes, labeled with green font and highlighted, were significant in both datasets. For the rest of the genes in the PCR dataset, the association was either nonsignificant or the direction was reversed (Fold Change < 1); thus, gene expression was higher in responders.

| GENE SYMBOL  | RFS        |           |             |                   |              | PCR             |             |              |                |
|--------------|------------|-----------|-------------|-------------------|--------------|-----------------|-------------|--------------|----------------|
|              | N_nonresp  | N_resp    | Fold Change | MannW_p           | ROC AUC      | ROC_AUC_p       | Fold Change | ROC AUC      | ROC_AUC_p      |
| <b>KMO</b>   | <b>121</b> | <b>66</b> | <b>1.45</b> | <b>0.00011447</b> | <b>0.671</b> | <b>2.70E-05</b> | <b>1.08</b> | <b>0.585</b> | <b>0.00029</b> |
| UBE2D1       | 121        | 66        | 1.45        | 1.83E-05          | 0.69         | 1.20E-06        | 0.63        | 0.698        | 0              |
| VSIG4        | 121        | 66        | 1.45        | 8.50E-05          | 0.674        | 1.20E-05        | 0.89        | 0.533        | 0.094          |
| SLA          | 121        | 66        | 1.45        | 0.00010742        | 0.672        | 8.60E-06        | 1.11        | 0.521        | 0.19           |
| CPVL         | 121        | 66        | 1.46        | 2.40E-05          | 0.687        | 4.00E-06        | 0.87        | 0.588        | 0.00011        |
| DOK5         | 121        | 66        | 1.46        | 4.09E-05          | 0.682        | 4.80E-06        | 1.03        | 0.538        | 0.063          |
| RGL1         | 121        | 66        | 1.47        | 2.02E-06          | 0.71         | 5.10E-08        | 0.85        | 0.584        | 0.0002         |
| LPXN         | 121        | 66        | 1.47        | 1.58E-05          | 0.691        | 5.00E-07        | 1.03        | 0.502        | 0.48           |
| HEY1         | 121        | 66        | 1.47        | 5.92E-05          | 0.678        | 7.00E-06        | 1.03        | 0.528        | 0.13           |
| C11orf75     | 121        | 66        | 1.48        | 2.67E-05          | 0.686        | 6.60E-06        | 0.73        | 0.669        | 9.2E-15        |
| SEMA4D       | 121        | 66        | 1.48        | 6.55E-05          | 0.677        | 3.50E-06        | 1.07        | 0.512        | 0.31           |
| C1orf38      | 121        | 66        | 1.49        | 2.19E-06          | 0.71         | 1.00E-07        | 1.20        | 0.538        | 0.055          |
| SLC9A6       | 121        | 66        | 1.49        | 1.28E-05          | 0.693        | 2.10E-06        | 0.90        | 0.59         | 0.000052       |
| SAT1         | 121        | 66        | 1.49        | 5.19E-05          | 0.679        | 6.80E-06        | 0.67        | 0.674        | 5.4E-14        |
| TUBB6        | 121        | 66        | 1.49        | 8.45E-05          | 0.674        | 1.30E-05        | 0.69        | 0.695        | 0              |
| <b>PRAME</b> | <b>121</b> | <b>66</b> | <b>1.50</b> | <b>1.43E-05</b>   | <b>0.692</b> | <b>1.50E-06</b> | <b>1.03</b> | <b>0.55</b>  | <b>0.029</b>   |
| SDCBP        | 121        | 66        | 1.50        | 1.03E-05          | 0.695        | 1.90E-07        | 0.81        | 0.634        | 6.1E-09        |
| ENPP2        | 121        | 66        | 1.51        | 4.62E-05          | 0.681        | 1.10E-05        | 0.59        | 0.673        | 3.6E-14        |
| CD14         | 121        | 66        | 1.51        | 0.00013297        | 0.669        | 4.10E-05        | 0.90        | 0.603        | 0.000006       |
| <b>AIM2</b>  | <b>121</b> | <b>66</b> | <b>1.52</b> | <b>0.00012846</b> | <b>0.67</b>  | <b>1.60E-05</b> | <b>1.06</b> | <b>0.552</b> | <b>0.023</b>   |
| MX2          | 121        | 66        | 1.52        | 9.48E-06          | 0.696        | 5.70E-07        | 1.12        | 0.537        | 0.062          |
| DTX4         | 121        | 66        | 1.52        | 0.00013528        | 0.669        | 2.10E-05        | 1.05        | 0.537        | 0.07           |
| <b>PLAC8</b> | <b>121</b> | <b>66</b> | <b>1.54</b> | <b>0.0001192</b>  | <b>0.67</b>  | <b>1.70E-05</b> | <b>1.19</b> | <b>0.559</b> | <b>0.0095</b>  |
| DFNA5        | 121        | 66        | 1.54        | 1.97E-07          | 0.73         | 7.10E-10        | 0.97        | 0.537        | 0.063          |
| LBH          | 121        | 66        | 1.55        | 1.94E-05          | 0.689        | 1.00E-06        | 0.83        | 0.595        | 0.000037       |
| MSN          | 121        | 66        | 1.56        | 3.67E-05          | 0.683        | 5.80E-06        | 0.60        | 0.71         | 0              |
| WIPF1        | 121        | 66        | 1.59        | 7.12E-05          | 0.676        | 9.30E-06        | 0.62        | 0.67         | 3.4E-13        |

|              |            |           |             |                 |              |                 |             |              |                |
|--------------|------------|-----------|-------------|-----------------|--------------|-----------------|-------------|--------------|----------------|
| NXN          | 121        | 66        | 1.62        | 1.22E-05        | 0.694        | 1.20E-06        | 0.78        | 0.646        | 5.2E-11        |
| HCLS1        | 121        | 66        | 1.63        | 0.00012059      | 0.67         | 1.10E-05        | 1.00        | 0.527        | 0.13           |
| <b>VSNL1</b> | <b>121</b> | <b>66</b> | <b>1.66</b> | <b>2.95E-05</b> | <b>0.685</b> | <b>2.10E-06</b> | <b>1.24</b> | <b>0.583</b> | <b>0.00045</b> |
| GABRE        | 121        | 66        | 1.66        | 8.99E-06        | 0.697        | 5.90E-07        | 0.89        | 0.505        | 0.42           |
| PLS3         | 121        | 66        | 1.68        | 6.91E-06        | 0.699        | 6.10E-07        | 0.60        | 0.701        | 0              |
| SEPT6        | 121        | 66        | 1.68        | 8.15E-06        | 0.698        | 3.10E-07        | 0.80        | 0.625        | 0.000000076    |
| GPNMB        | 121        | 66        | 1.69        | 9.11E-06        | 0.697        | 5.40E-07        | 0.70        | 0.672        | 1.4E-14        |
| CCR1         | 121        | 66        | 1.70        | 7.14E-07        | 0.72         | 6.80E-09        | 1.00        | 0.535        | 0.077          |
| LMO2         | 121        | 66        | 1.71        | 6.50E-07        | 0.72         | 2.60E-09        | 1.05        | 0.507        | 0.39           |
| ANXA1        | 121        | 66        | 1.72        | 5.41E-07        | 0.722        | 1.10E-08        | 0.75        | 0.654        | 4.6E-12        |
| SLC7A5       | 121        | 66        | 1.72        | 3.01E-05        | 0.685        | 6.30E-06        | 0.89        | 0.561        | 0.0062         |
| ACOT9        | 121        | 66        | 1.74        | 2.71E-07        | 0.728        | 3.80E-10        | 0.82        | 0.628        | 7.1E-09        |
| ADM          | 121        | 66        | 1.76        | 7.08E-05        | 0.676        | 7.00E-06        | 0.82        | 0.581        | 0.00031        |
| PLOD2        | 121        | 66        | 1.79        | 3.54E-06        | 0.705        | 9.10E-08        | 0.64        | 0.69         | 0              |
| FOLR1        | 121        | 66        | 1.84        | 3.36E-05        | 0.684        | 4.20E-06        | 0.98        | 0.546        | 0.042          |
| EVI2A        | 121        | 66        | 1.84        | 6.40E-05        | 0.677        | 4.10E-06        | 1.03        | 0.535        | 0.074          |
| HMOX1        | 121        | 66        | 1.86        | 7.50E-08        | 0.738        | 4.80E-11        | 0.87        | 0.574        | 0.0013         |
| LYN          | 121        | 66        | 1.88        | 1.08E-08        | 0.753        | 3.50E-12        | 0.73        | 0.653        | 1.2E-11        |
| CHI3L1       | 121        | 66        | 2.03        | 3.53E-05        | 0.683        | 7.40E-06        | 0.71        | 0.611        | 0.0000011      |
| LY96         | 121        | 66        | 2.04        | 9.71E-08        | 0.736        | 6.30E-11        | 0.78        | 0.63         | 0.000000013    |
| RARRES1      | 121        | 66        | 2.22        | 2.76E-05        | 0.686        | 3.00E-06        | 0.76        | 0.677        | 3.3E-16        |
| TMEM45A      | 121        | 66        | 2.35        | 8.21E-05        | 0.674        | 7.00E-06        | 0.81        | 0.637        | 7E-10          |
| <b>CALB2</b> | <b>121</b> | <b>66</b> | <b>2.39</b> | <b>7.57E-07</b> | <b>0.719</b> | <b>9.70E-09</b> | <b>1.08</b> | <b>0.566</b> | <b>0.0051</b>  |
| DEFB1        | 121        | 66        | 2.66        | 7.47E-05        | 0.675        | 9.80E-06        | 1.07        | 0.51         | 0.35           |
