# Supplementary material for: Resistance to Combined Anthracycline–Taxane Chemotherapy Is Associated with Altered Metabolism and Inflammation in Breast Carcinomas
Source: MDPI journal article supplement (doi:10.3390/ijms25021063), 2024-01-15
Supplement: s1 [file s1]

**Supplemental Table S1:**

Of the 224 overexpressed genes in tumor samples not developing PCR following an anthracycline-taxane treatment, 135 genes had AUC values of 0.7 or higher.

| Gene            | Mean-nonresponder | Mean-responder | Fold change | MannW_p  | ROC AUC | ROC_AUC_p |
|-----------------|-------------------|----------------|-------------|----------|---------|-----------|
| <b>ORAI3</b>    | 934.6             | 580.6          | 1.61        | 7.87E-28 | 0.77    | p<1E-16   |
| <b>BCAM</b>     | 972.1             | 417.3          | 2.33        | 4.29E-25 | 0.756   | p<1E-16   |
| <b>ATP6V0A1</b> | 945.1             | 592.5          | 1.6         | 9.53E-25 | 0.754   | p<1E-16   |
| <b>KIAA0556</b> | 949.5             | 614.4          | 1.55        | 1.67E-24 | 0.753   | p<1E-16   |
| <b>TNK1</b>     | 833.5             | 463.8          | 1.8         | 5.87E-24 | 0.75    | p<1E-16   |
| <b>RAB26</b>    | 582.0             | 330.2          | 1.76        | 5.20E-24 | 0.75    | p<1E-16   |
| <b>ILK</b>      | 1440.0            | 964.5          | 1.49        | 1.59E-23 | 0.747   | p<1E-16   |
| <b>KIAA0586</b> | 514.6             | 328.2          | 1.57        | 3.74E-23 | 0.745   | p<1E-16   |
| <b>FAM63A</b>   | 1178.4            | 673.4          | 1.75        | 4.67E-23 | 0.744   | p<1E-16   |
| <b>SKAP1</b>    | 662.9             | 378.9          | 1.75        | 9.76E-23 | 0.743   | p<1E-16   |
| <b>C8orf30A</b> | 1418.2            | 831.1          | 1.71        | 9.02E-23 | 0.743   | p<1E-16   |
| <b>BLOC1S1</b>  | 1384.2            | 884.7          | 1.56        | 7.79E-23 | 0.743   | p<1E-16   |
| <b>ZNF629</b>   | 764.7             | 511.3          | 1.5         | 1.29E-22 | 0.742   | p<1E-16   |
| <b>GRINA</b>    | 968.8             | 570.7          | 1.7         | 2.19E-22 | 0.741   | p<1E-16   |
| <b>ITPKC</b>    | 630.8             | 404.4          | 1.56        | 3.39E-22 | 0.74    | p<1E-16   |
| <b>SALL2</b>    | 750.8             | 439.2          | 1.71        | 4.95E-22 | 0.739   | p<1E-16   |
| <b>P4HTM</b>    | 1576.4            | 923.0          | 1.71        | 3.82E-22 | 0.739   | p<1E-16   |
| <b>CNR2</b>     | 536.9             | 256.3          | 2.1         | 7.57E-22 | 0.737   | p<1E-16   |
| <b>C19orf22</b> | 4693.4            | 2569.9         | 1.83        | 7.98E-22 | 0.737   | p<1E-16   |
| <b>APBB3</b>    | 581.0             | 358.1          | 1.62        | 1.11E-21 | 0.737   | p<1E-16   |
| <b>STXBP2</b>   | 516.7             | 269.2          | 1.92        | 1.20E-21 | 0.736   | p<1E-16   |
| <b>ADAP1</b>    | 959.8             | 581.7          | 1.65        | 1.36E-21 | 0.736   | p<1E-16   |
| <b>PPP2R4</b>   | 1018.9            | 632.0          | 1.61        | 1.47E-21 | 0.736   | p<1E-16   |
| <b>RAB17</b>    | 603.0             | 338.4          | 1.78        | 2.06E-21 | 0.735   | p<1E-16   |
| <b>NAPA</b>     | 1117.6            | 642.8          | 1.74        | 3.27E-21 | 0.734   | p<1E-16   |
| <b>CNNM3</b>    | 734.3             | 445.8          | 1.65        | 2.57E-21 | 0.734   | p<1E-16   |
| <b>DALRD3</b>   | 1316.1            | 812.5          | 1.62        | 4.01E-21 | 0.733   | p<1E-16   |
| <b>CHST10</b>   | 580.7             | 376.5          | 1.54        | 4.90E-21 | 0.733   | p<1E-16   |
| <b>GRIK5</b>    | 514.1             | 267.2          | 1.92        | 6.70E-21 | 0.732   | p<1E-16   |
| <b>PCGF1</b>    | 602.0             | 348.5          | 1.73        | 7.50E-21 | 0.732   | p<1E-16   |
| <b>FXYD3</b>    | 1842.2            | 1156.2         | 1.59        | 7.49E-21 | 0.732   | p<1E-16   |
| <b>GDI1</b>     | 1945.2            | 1259.5         | 1.54        | 6.76E-21 | 0.732   | p<1E-16   |
| <b>ERAL1</b>    | 629.5             | 408.6          | 1.54        | 7.41E-21 | 0.732   | p<1E-16   |
| <b>CNTD2</b>    | 769.0             | 411.0          | 1.87        | 9.85E-21 | 0.731   | p<1E-16   |
| <b>TPCN1</b>    | 839.1             | 551.1          | 1.52        | 1.06E-20 | 0.731   | p<1E-16   |

|                 |        |        |      |          |       |         |
|-----------------|--------|--------|------|----------|-------|---------|
| <b>PCGF2</b>    | 762.2  | 501.9  | 1.52 | 1.05E-20 | 0.731 | p<1E-16 |
| <b>ZYX</b>      | 1062.1 | 612.9  | 1.73 | 1.22E-20 | 0.73  | p<1E-16 |
| <b>SCAMP5</b>   | 539.7  | 317.8  | 1.7  | 1.60E-20 | 0.73  | p<1E-16 |
| <b>ABHD4</b>    | 1138.7 | 748.3  | 1.52 | 1.54E-20 | 0.73  | p<1E-16 |
| <b>MGRN1</b>    | 1064.1 | 724.1  | 1.47 | 1.46E-20 | 0.73  | p<1E-16 |
| <b>ZNF552</b>   | 969.9  | 497.9  | 1.95 | 2.34E-20 | 0.729 | p<1E-16 |
| <b>CALCOCO1</b> | 917.0  | 544.4  | 1.68 | 2.34E-20 | 0.729 | p<1E-16 |
| <b>FLOT2</b>    | 1435.5 | 902.7  | 1.59 | 1.88E-20 | 0.729 | p<1E-16 |
| <b>FPGS</b>     | 610.0  | 384.2  | 1.59 | 1.91E-20 | 0.729 | p<1E-16 |
| <b>TBC1D10B</b> | 1008.1 | 667.1  | 1.51 | 2.39E-20 | 0.729 | p<1E-16 |
| <b>DOLPP1</b>   | 876.5  | 592.2  | 1.48 | 2.03E-20 | 0.729 | p<1E-16 |
| <b>TCTN2</b>    | 1515.0 | 747.9  | 2.03 | 3.05E-20 | 0.728 | p<1E-16 |
| <b>KDM6B</b>    | 1097.6 | 603.5  | 1.82 | 2.63E-20 | 0.728 | p<1E-16 |
| <b>PTPN9</b>    | 564.5  | 358.7  | 1.57 | 2.71E-20 | 0.728 | p<1E-16 |
| <b>DGKA</b>     | 687.4  | 436.7  | 1.57 | 2.80E-20 | 0.728 | p<1E-16 |
| <b>C9orf7</b>   | 525.1  | 320.1  | 1.64 | 4.68E-20 | 0.727 | p<1E-16 |
| <b>FAM102A</b>  | 1379.4 | 885.2  | 1.56 | 4.67E-20 | 0.727 | p<1E-16 |
| <b>NECAB3</b>   | 661.5  | 428.0  | 1.55 | 4.00E-20 | 0.727 | p<1E-16 |
| <b>MLEC</b>     | 1824.7 | 1190.8 | 1.53 | 3.72E-20 | 0.727 | p<1E-16 |
| <b>ABCA2</b>    | 513.6  | 307.9  | 1.67 | 7.29E-20 | 0.726 | p<1E-16 |
| <b>ROGDI</b>    | 857.5  | 524.2  | 1.64 | 6.30E-20 | 0.726 | p<1E-16 |
| <b>MOSPD3</b>   | 517.3  | 323.2  | 1.6  | 7.02E-20 | 0.726 | p<1E-16 |
| <b>NUCB1</b>    | 1075.0 | 658.4  | 1.63 | 9.24E-20 | 0.725 | p<1E-16 |
| <b>PHLDA3</b>   | 710.9  | 457.8  | 1.55 | 9.90E-20 | 0.725 | p<1E-16 |
| <b>MAZ</b>      | 1196.7 | 802.5  | 1.49 | 7.60E-20 | 0.725 | p<1E-16 |
| <b>TAC3</b>     | 511.9  | 273.9  | 1.87 | 1.14E-19 | 0.724 | p<1E-16 |
| <b>CCDC9</b>    | 658.5  | 384.9  | 1.71 | 1.20E-19 | 0.724 | p<1E-16 |
| <b>MYL4</b>     | 572.7  | 295.0  | 1.94 | 2.52E-19 | 0.722 | p<1E-16 |
| <b>WFS1</b>     | 1021.1 | 662.1  | 1.54 | 3.17E-19 | 0.722 | p<1E-16 |
| <b>PRR5</b>     | 736.6  | 508.7  | 1.45 | 2.78E-19 | 0.722 | p<1E-16 |
| <b>NR1D1</b>    | 978.7  | 540.1  | 1.81 | 3.30E-19 | 0.721 | p<1E-16 |
| <b>SLC2A9</b>   | 591.1  | 346.5  | 1.71 | 4.73E-19 | 0.721 | p<1E-16 |
| <b>IDUA</b>     | 501.7  | 309.5  | 1.62 | 3.68E-19 | 0.721 | p<1E-16 |
| <b>AGRN</b>     | 1091.5 | 685.8  | 1.59 | 5.09E-19 | 0.72  | p<1E-16 |
| <b>CHPF</b>     | 735.7  | 471.5  | 1.56 | 5.42E-19 | 0.72  | p<1E-16 |
| <b>BAP1</b>     | 640.3  | 440.0  | 1.46 | 5.50E-19 | 0.72  | p<1E-16 |
| <b>C19orf21</b> | 589.1  | 292.4  | 2.02 | 9.43E-19 | 0.719 | p<1E-16 |
| <b>EPB49</b>    | 529.6  | 288.5  | 1.84 | 9.45E-19 | 0.719 | p<1E-16 |
| <b>ARFIP2</b>   | 1327.2 | 823.7  | 1.61 | 8.14E-19 | 0.719 | p<1E-16 |
| <b>ZNF467</b>   | 617.6  | 407.3  | 1.52 | 7.26E-19 | 0.719 | p<1E-16 |
| <b>MCRS1</b>    | 593.8  | 406.0  | 1.46 | 7.05E-19 | 0.719 | p<1E-16 |
| <b>PARP16</b>   | 553.4  | 382.0  | 1.45 | 7.89E-19 | 0.719 | p<1E-16 |
| <b>SAP25</b>    | 725.7  | 422.1  | 1.72 | 1.30E-18 | 0.718 | p<1E-16 |

|                  |         |        |      |          |       |         |
|------------------|---------|--------|------|----------|-------|---------|
| <b>RAB3IL1</b>   | 600.2   | 349.8  | 1.72 | 1.20E-18 | 0.718 | p<1E-16 |
| <b>IMPDH1</b>    | 965.1   | 655.1  | 1.47 | 1.06E-18 | 0.718 | p<1E-16 |
| <b>LOC171220</b> | 736.7   | 472.7  | 1.56 | 1.61E-18 | 0.717 | p<1E-16 |
| <b>SORBS3</b>    | 545.7   | 357.9  | 1.52 | 1.88E-18 | 0.717 | p<1E-16 |
| <b>SHROOM2</b>   | 507.3   | 340.5  | 1.49 | 1.50E-18 | 0.717 | p<1E-16 |
| <b>TRMT2B</b>    | 564.2   | 350.3  | 1.61 | 2.75E-18 | 0.716 | p<1E-16 |
| <b>PPP2R1A</b>   | 1344.2  | 850.2  | 1.58 | 2.08E-18 | 0.716 | p<1E-16 |
| <b>MVK</b>       | 1301.6  | 823.5  | 1.58 | 2.68E-18 | 0.716 | p<1E-16 |
| <b>GIT1</b>      | 686.8   | 382.1  | 1.8  | 3.46E-18 | 0.715 | p<1E-16 |
| <b>IKBKG</b>     | 1010.3  | 589.0  | 1.72 | 2.97E-18 | 0.715 | p<1E-16 |
| <b>MID1IP1</b>   | 669.9   | 439.7  | 1.52 | 3.47E-18 | 0.715 | p<1E-16 |
| <b>SPR</b>       | 981.2   | 653.3  | 1.5  | 4.85E-18 | 0.714 | p<1E-16 |
| <b>OPHN1</b>     | 10424.7 | 5011.5 | 2.08 | 6.15E-18 | 0.713 | p<1E-16 |
| <b>GSK3A</b>     | 846.2   | 544.0  | 1.56 | 7.90E-18 | 0.713 | p<1E-16 |
| <b>AVPI1</b>     | 769.8   | 523.5  | 1.47 | 6.12E-18 | 0.713 | p<1E-16 |
| <b>GNAI2</b>     | 895.3   | 612.7  | 1.46 | 7.18E-18 | 0.713 | p<1E-16 |
| <b>REEP1</b>     | 667.0   | 369.0  | 1.81 | 9.62E-18 | 0.712 | p<1E-16 |
| <b>DMWD</b>      | 1034.8  | 609.9  | 1.7  | 1.07E-17 | 0.712 | p<1E-16 |
| <b>PXN</b>       | 930.2   | 631.0  | 1.47 | 9.76E-18 | 0.712 | p<1E-16 |
| <b>COX10</b>     | 751.3   | 513.4  | 1.46 | 9.45E-18 | 0.712 | p<1E-16 |
| <b>EEF1A2</b>    | 896.7   | 276.4  | 3.24 | 1.67E-17 | 0.711 | p<1E-16 |
| <b>EPHX1</b>     | 1378.9  | 728.5  | 1.89 | 1.22E-17 | 0.711 | p<1E-16 |
| <b>EML3</b>      | 619.5   | 405.2  | 1.53 | 1.43E-17 | 0.711 | p<1E-16 |
| <b>RMND5B</b>    | 619.5   | 422.8  | 1.47 | 1.58E-17 | 0.711 | p<1E-16 |
| <b>CGA</b>       | 823.3   | 212.8  | 3.87 | 1.71E-17 | 0.71  | p<1E-16 |
| <b>RNF122</b>    | 594.5   | 347.1  | 1.71 | 2.09E-17 | 0.71  | p<1E-16 |
| <b>MAP1A</b>     | 637.1   | 398.1  | 1.6  | 1.79E-17 | 0.71  | p<1E-16 |
| <b>BSG</b>       | 1157.0  | 767.1  | 1.51 | 2.09E-17 | 0.71  | p<1E-16 |
| <b>ARHGEF16</b>  | 514.1   | 341.5  | 1.51 | 2.38E-17 | 0.71  | p<1E-16 |
| <b>SLC22A5</b>   | 716.4   | 481.7  | 1.49 | 1.91E-17 | 0.71  | p<1E-16 |
| <b>SYT1</b>      | 712.5   | 404.9  | 1.76 | 3.16E-17 | 0.709 | p<1E-16 |
| <b>ARHGDIA</b>   | 2101.6  | 1335.1 | 1.57 | 2.69E-17 | 0.709 | p<1E-16 |
| <b>SAPS1</b>     | 595.7   | 407.0  | 1.46 | 3.23E-17 | 0.709 | p<1E-16 |
| <b>MEFV</b>      | 538.8   | 233.6  | 2.31 | 4.64E-17 | 0.708 | p<1E-16 |
| <b>AATK</b>      | 505.5   | 319.5  | 1.58 | 3.99E-17 | 0.708 | p<1E-16 |
| <b>KIAA1467</b>  | 907.3   | 536.6  | 1.69 | 4.94E-17 | 0.707 | p<1E-16 |
| <b>ATP10B</b>    | 572.4   | 318.7  | 1.8  | 8.06E-17 | 0.706 | p<1E-16 |
| <b>BANF1</b>     | 2731.5  | 1748.7 | 1.56 | 8.49E-17 | 0.706 | p<1E-16 |
| <b>TSPYL2</b>    | 622.4   | 402.3  | 1.55 | 7.62E-17 | 0.706 | p<1E-16 |
| <b>C12orf49</b>  | 753.9   | 510.1  | 1.48 | 9.29E-17 | 0.706 | p<1E-16 |
| <b>IPO13</b>     | 714.4   | 483.7  | 1.48 | 6.74E-17 | 0.706 | p<1E-16 |
| <b>UBA1</b>      | 3649.4  | 2508.7 | 1.45 | 7.65E-17 | 0.706 | p<1E-16 |
| <b>SEMA4A</b>    | 744.7   | 474.0  | 1.57 | 1.12E-16 | 0.705 | p<1E-16 |

|                |        |        |      |          |       |         |
|----------------|--------|--------|------|----------|-------|---------|
| <b>REEP4</b>   | 876.1  | 599.7  | 1.46 | 1.07E-16 | 0.705 | p<1E-16 |
| <b>CYP1A2</b>  | 524.9  | 297.9  | 1.76 | 1.37E-16 | 0.704 | p<1E-16 |
| <b>CYP3A4</b>  | 593.2  | 352.3  | 1.68 | 1.64E-16 | 0.704 | p<1E-16 |
| <b>CLPTM1</b>  | 690.1  | 422.3  | 1.63 | 1.47E-16 | 0.704 | p<1E-16 |
| <b>PCBD1</b>   | 772.0  | 499.3  | 1.55 | 1.62E-16 | 0.704 | p<1E-16 |
| <b>PKM2</b>    | 2953.3 | 1768.5 | 1.67 | 2.28E-16 | 0.703 | p<1E-16 |
| <b>OGFR</b>    | 695.9  | 464.1  | 1.5  | 2.40E-16 | 0.703 | p<1E-16 |
| <b>CEP250</b>  | 586.2  | 400.1  | 1.47 | 2.29E-16 | 0.703 | p<1E-16 |
| <b>SPATA20</b> | 1134.0 | 747.5  | 1.52 | 3.23E-16 | 0.702 | p<1E-16 |
| <b>MIIP</b>    | 981.6  | 670.3  | 1.46 | 3.35E-16 | 0.702 | p<1E-16 |
| <b>TRIP10</b>  | 554.4  | 352.4  | 1.57 | 3.72E-16 | 0.701 | p<1E-16 |
| <b>FMO4</b>    | 642.5  | 434.9  | 1.48 | 5.04E-16 | 0.701 | p<1E-16 |
| <b>PPP2R5D</b> | 1200.6 | 821.0  | 1.46 | 4.48E-16 | 0.701 | p<1E-16 |
| <b>CYP2A6</b>  | 667.5  | 241.7  | 2.76 | 6.73E-16 | 0.7   | p<1E-16 |
